# Supplementary material for: Generation of oxygen vacancies in visible light activated one-dimensional iodine TiO2 photocatalysts
Source: Royal Society of Chemistry journal article supplement (doi:10.1039/c4ra04768k), 2014-01-01
Supplement: c4ra04768k1.pdf [file c4ra04768k1.pdf]

## SUPPORTING INFORMATION

### **Generation of oxygen vacancies in visible light activated one-dimensional iodine TiO<sub>2</sub> photocatalysts**

Wenjuan Li <sup>a,b</sup>, Robert Liang <sup>b,c</sup>, Anming Hu <sup>b,d</sup>, Zhaohui Huang <sup>a</sup> and Y. Norman Zhou <sup>b,c,\*</sup>

<sup>a</sup> School of Materials Science and Engineering, China University of Geosciences, Beijing 100083, P.R. China

<sup>b</sup> Department of Mechanical and Mechatronics, University of Waterloo, Waterloo N2L 3G1, Ontario, Canada

<sup>c</sup> Waterloo Institute for Nanotechnology, University of Waterloo, Waterloo, ON, N2L 3G1, Ontario, Canada

<sup>d</sup> Mechanical, Aerospace, & Biomedical Engineering Department, University of Tennessee – Knoxville, Knoxville, TN, 37996-2210, USA

\* Corresponding author:

Tel. +1-519-888-4567 ext.36095

Email: nzhou@uwaterloo.ca

### Figure Captions

Figure S1 X-ray diffraction spectra of as prepared (a) 2-I/TiO<sub>2</sub>-150 and (b) 2-I/TiO<sub>2</sub>-250.

Figure S2 Raman spectra of as prepared (a) 2-I/TiO<sub>2</sub>-150 and (b) 2-I/TiO<sub>2</sub>-250.

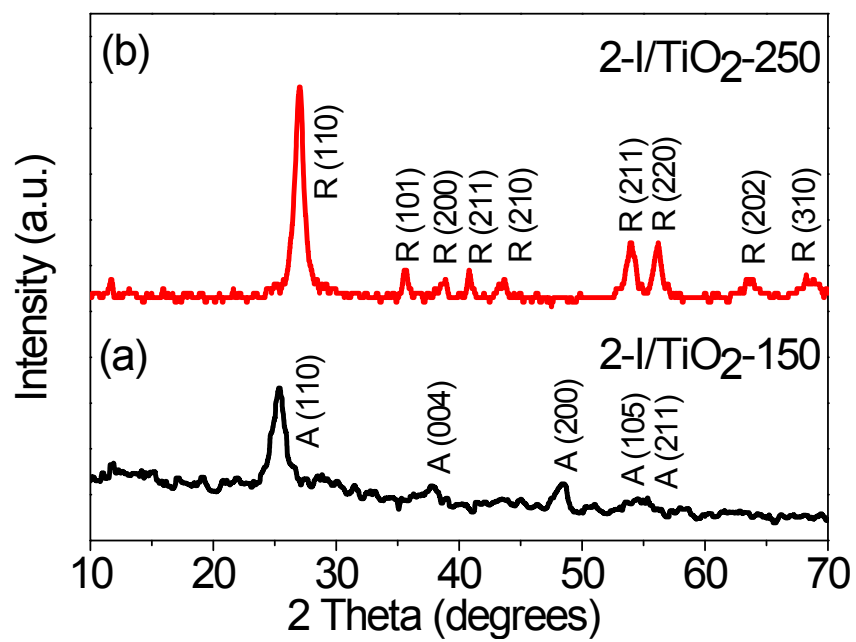

Figure S1

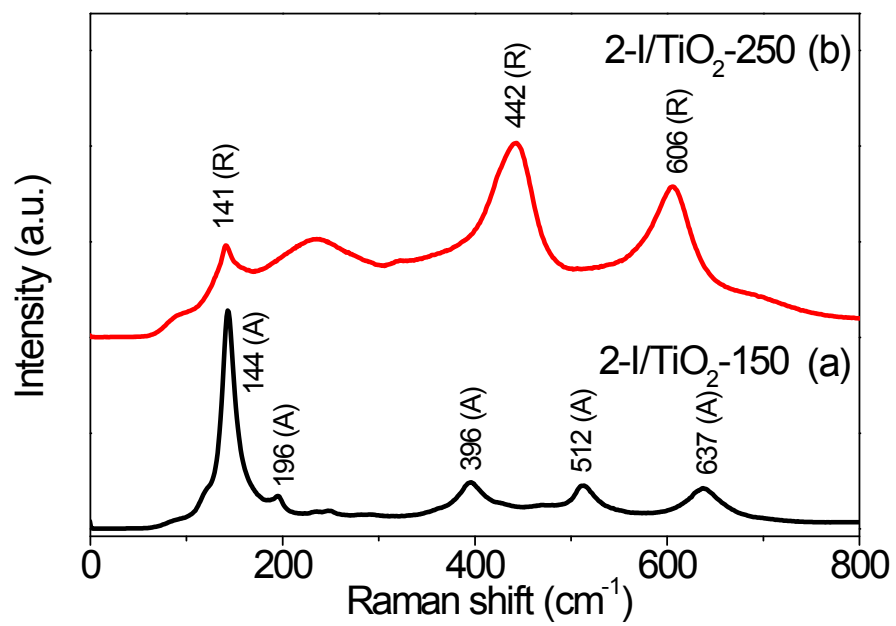

Figure S2
